# Supplementary material for: The C2A domain of synaptotagmin is an essential component of the calcium sensor for synaptic transmission
Source: PubMed Central journal article supplement (PMC7006929; doi:10.1371/journal.pone.0228348), 2020-02-07

### Raw Blot Images Figure 3 A,B

All blots were loaded left to right and imaged on an Epichemi3 Darkroom with Labworks Imaging Software. Ladder in all blots was Thermo Scientific PageRuler Prestained Protein Ladder. Lanes were only excluded (X) if the actin levels were 3 standard deviations from the mean actin level calculated within the blot. Genotypes: 1-*P[sytWT]*, 2- *P[sytA-ME]*, 3- *P[sytA-ME,FE]*

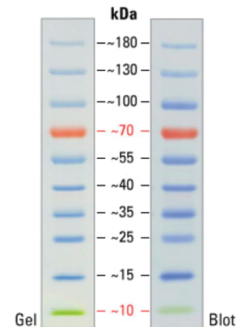

2016.06.30 A

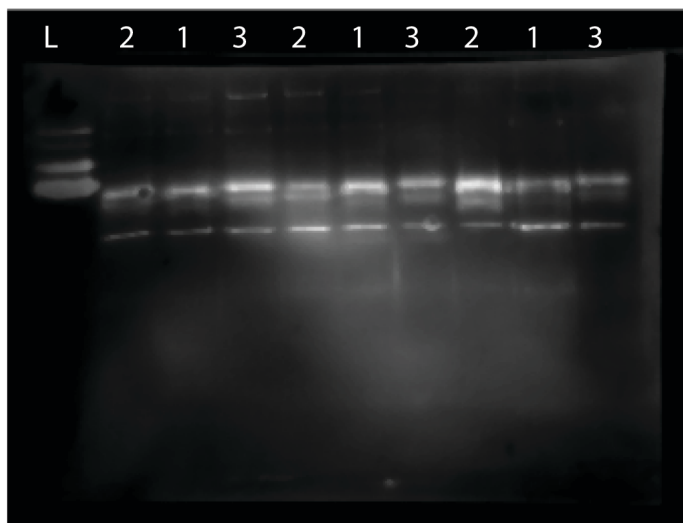

2016.07.08 B

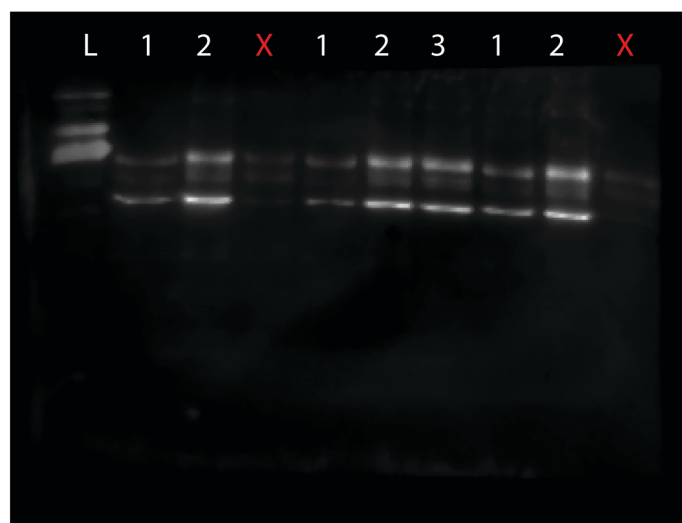

2016.07.14 A (Rep lanes for Fig 3A in red)

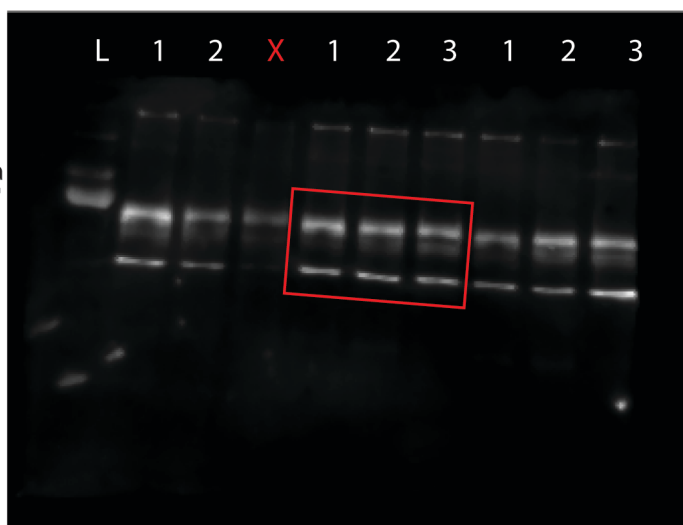

2016.07.14 B

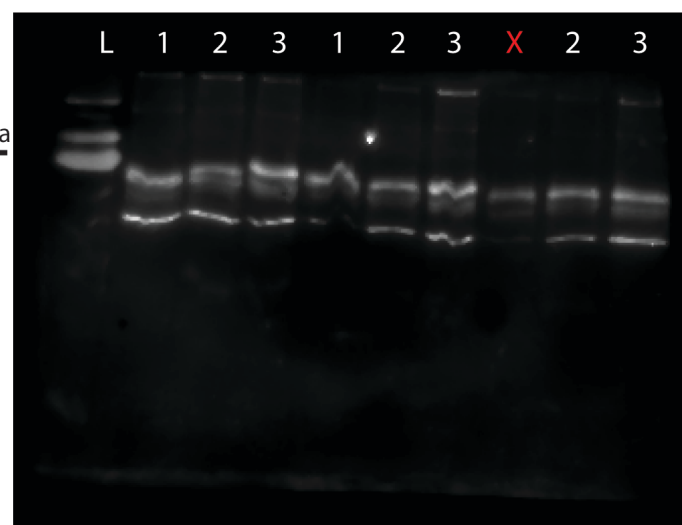

2016.07.20 A

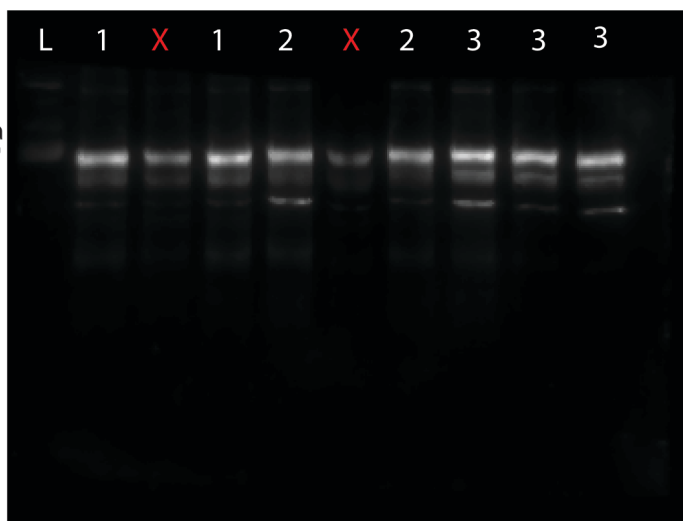

2016.07.20 B

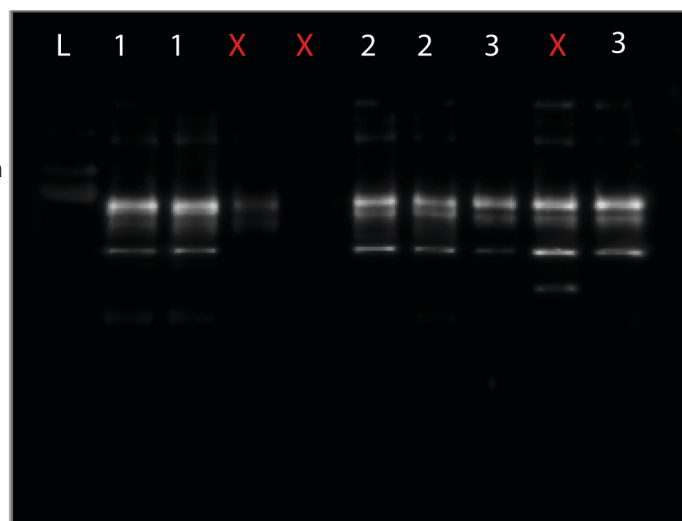

Supplement: pone.0228348.s001.pdf [file pone.0228348.s001.pdf]
